# Supplementary material
Source: PubMed Central journal article supplement (PMC9006109)
Supplement: jama-e223391-s004.pdf [file jama-e223391-s004.pdf]

\*Indicates required information. Only first name, last name, and suffix will appear in PubMed.

| <b>*Group Name(s): The MOSAIC Trial Collaboration</b> |                   |                              |                  |                                                    |                                          |                                                                     |                                                                                            |
|-------------------------------------------------------|-------------------|------------------------------|------------------|----------------------------------------------------|------------------------------------------|---------------------------------------------------------------------|--------------------------------------------------------------------------------------------|
| <b>*First Name and Middle Initial(s)</b>              | <b>*Last Name</b> | <b>*Suffix (eg, Jr, III)</b> | Academic Degrees | Institution                                        | Location (city, state/province, country) | Role or Contribution, eg, chair, principal investigator             | Group (if more than 1 Group listed in the byline) and/or Subgroup (eg, Steering Committee) |
| David                                                 | French            |                              |                  | University of Manchester                           | Manchester, United Kingdom               | Chair, Trial Steering committee/Data monitoring & Ethics Committee  |                                                                                            |
| Esther                                                | Williamson        |                              |                  | University of Oxford                               | Oxford, United Kingdom                   | Member, Trial Steering committee/Data monitoring & Ethics Committee |                                                                                            |
| Catherine                                             | Minns- Lowe       |                              |                  | University of Hertford                             | Hatfield, United Kingdom                 | Member, Trial Steering committee/Data monitoring & Ethics Committee |                                                                                            |
| Nicholas                                              | Longford          |                              |                  | Imperial College London                            | London, United Kingdom                   | Member, Trial Steering committee/Data monitoring & Ethics Committee |                                                                                            |
| Sanjay                                                | Patel             |                              |                  | Guy's & St Thomas' Hospitals NHS Foundation Trust  | London, United Kingdom                   | Principal Investigator                                              |                                                                                            |
| Peter                                                 | Holt              |                              |                  | St George's Hospital NHS Foundation Trust          | London, United Kingdom                   | Principal Investigator                                              |                                                                                            |
| Abdullah                                              | Jiwabi            |                              |                  | Ashford & St Peter's Hospital NHS Foundation Trust | Ashford, Surrey                          | Principal Investigator                                              |                                                                                            |
| Sharlene                                              | Greenwood         |                              |                  | King's College Hospital NHS Foundation Trust       | London, United Kingdom                   | Principal Investigator                                              |                                                                                            |
| Janice                                                | Tsui              |                              |                  | Royal Free Hospital NHS Foundation Trust           | London, United Kingdom                   | Principal Investigator                                              |                                                                                            |
| Paritosh                                              | Sharma            |                              |                  | Royal London Hospital NHS Foundation Trust         | London, United Kingdom                   | Principal Investigator                                              |                                                                                            |
| Helen                                                 | Creasy            |                              |                  | Guy's & St Thomas' Hospitals NHS Foundation Trust  | London, United Kingdom                   | Physical therapist                                                  |                                                                                            |

\*Indicates required information. Only first name, last name, and suffix will appear in PubMed.

| *First Name and Middle Initial(s) | *Last Name    | *Suffix (eg, Jr, III) | Academic Degrees | Institution                                        | Location (city, state/province, country) | Role or Contribution, eg, chair, principal investigator | Group (if more than 1 Group listed in the byline) and/or Subgroup (eg, Steering Committee) |
|-----------------------------------|---------------|-----------------------|------------------|----------------------------------------------------|------------------------------------------|---------------------------------------------------------|--------------------------------------------------------------------------------------------|
| Heather                           | Waring        |                       |                  | Guy's & St Thomas' Hospitals NHS Foundation Trust  | London, United Kingdom                   | Physical therapist                                      |                                                                                            |
| Joanne                            | Barnes        |                       |                  | Guy's & St Thomas' Hospitals NHS Foundation Trust  | London, United Kingdom                   | Physical therapist                                      |                                                                                            |
| Jonathan                          | da Costa      |                       |                  | St George's Hospital NHS Foundation Trust          | London, United Kingdom                   | Physical therapist                                      |                                                                                            |
| Bethany                           | Hedges        |                       |                  | St George's Hospital NHS Foundation Trust          | London, United Kingdom                   | Physical therapist                                      |                                                                                            |
| Emma                              | Bowen         |                       |                  | St George's Hospital NHS Foundation Trust          | London, United Kingdom                   | Physical therapist                                      |                                                                                            |
| Stuart                            | Brandom       |                       |                  | St George's Hospital NHS Foundation Trust          | London, United Kingdom                   | Physical therapist                                      |                                                                                            |
| Leon                              | Palmer Wilson |                       |                  | Ashford & St Peter's Hospital NHS Foundation Trust | Surrey, United Kingdom                   | Physical therapist                                      |                                                                                            |
| Heather                           | Pursey        |                       |                  | Ashford & St Peter's Hospital NHS Foundation Trust | Surrey, United Kingdom                   | Physical therapist                                      |                                                                                            |
| Diana                             | Ascenso       |                       |                  | Ashford & St Peter's Hospital NHS Foundation Trust | Surrey, United Kingdom                   | Physical therapist                                      |                                                                                            |
| Ellen                             | Castle        |                       |                  | King's College Hospital NHS Foundation Trust       | London, United Kingdom                   | Physical therapist                                      |                                                                                            |
| Juliet                            | Mayes         |                       |                  | King's College Hospital NHS Foundation Trust       | London, United Kingdom                   | Physical therapist                                      |                                                                                            |
| Ellie                             | Lyons         |                       |                  | King's College Hospital NHS Foundation Trust       | London, United Kingdom                   | Physical therapist                                      |                                                                                            |
| Francesca                         | Gowing        |                       |                  | Royal Free Hospital NHS Foundation Trust           | London, United Kingdom                   | Physical therapist                                      |                                                                                            |
| Joanna                            | Buckley       |                       |                  | Royal Free Hospital NHS Foundation Trust           | London, United Kingdom                   | Physical therapist                                      |                                                                                            |
| Peter                             | May           |                       |                  | Royal London Hospital NHS Foundation Trust         | London, United Kingdom                   | Physical therapist                                      |                                                                                            |
